# Supplementary material for: Comparative Annotation Toolkit (CAT)—simultaneous clade and personal genome annotation
Source: PubMed Central journal article supplement — Genome Res. 2018 Jul;28(7):1029–38. doi: 10.1101/gr.233460.117 (PMC6028123; doi:10.1101/gr.233460.117), 2018-07
Supplement: supp_gr.233460.117_Supplemental_References.pdf [file supp_gr.233460.117_Supplemental_References.pdf]

## Supplementary References

1. Kent, W. J., Baertsch, R., Hinrichs, A., Miller, W. & Haussler, D. Evolution's cauldron: duplication, deletion, and rearrangement in the mouse and human genomes. *Proc. Natl. Acad. Sci.* 100, 11484–11489 (2003).
2. Kent, W. J. Blat the blast like alignment tool. *Genome research* 12, 656–664 (2002).
3. Garrison, E. & Marth, G. Haplotype-based variant detection from short-read sequencing. *arXiv preprint arXiv:1207.3907* (2012).
